# Supplementary material for: A Gamma-adapted subunit vaccine induces broadly neutralizing antibodies against SARS-CoV-2 variants and protects mice from infection
Source: PubMed Central journal article supplement (PMC10837449; doi:10.1038/s41467-024-45180-8), 2024-02-02
Supplement: 41467_2024_45180_MOESM1_ESM.pdf [file 41467_2024_45180_MOESM1_ESM.pdf]

**Title: A Gamma-adapted subunit vaccine induces broadly neutralizing antibodies against SARS-CoV-2 variants and protects mice from infection.**

**SUPPLEMENTARY INFORMATION**

**Supplementary Figure 1.**

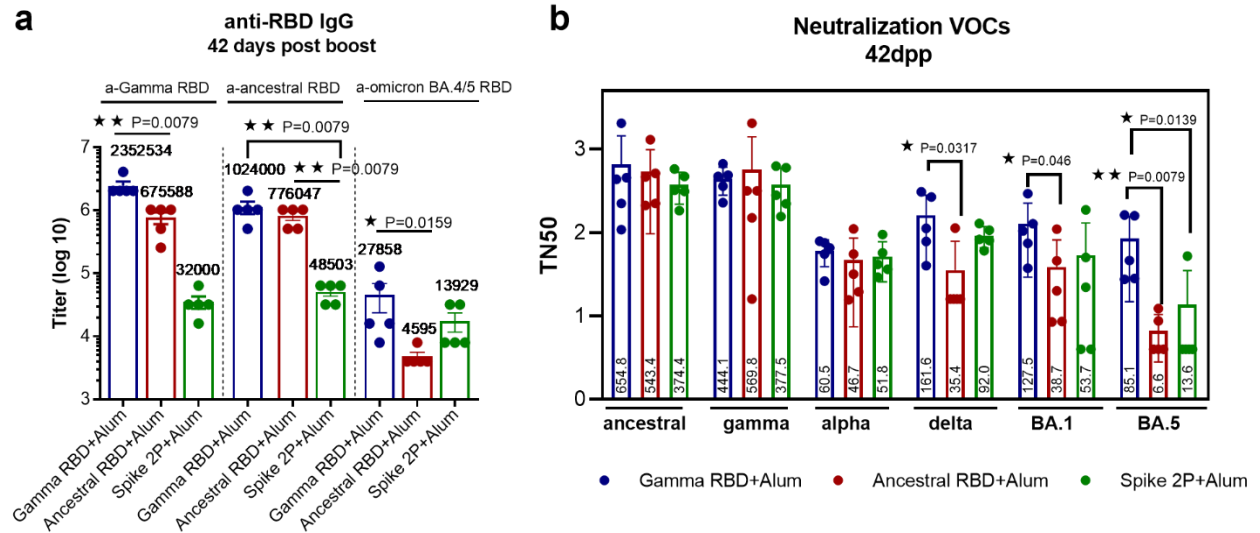

**Supplementary Figure 1. Antibody responses induced by different recombinant vaccine formulations in mice.** BALB/c mice were immunized i.m with i) Gamma RBD+Alum (blue circles, n= 5 mice), ii) Ancestral RBD+Alum (red circles, n= 5 mice) or iii) Spike 2P+Alum (green circles, n= 5 mice) on days 0 and 14. **a.** At day 42 specific antibody responses against RBD (Gamma, Ancestral or Omicron BA.4/5) were evaluated in serum by ELISA. Error Bars are Mean  $\pm$  SD values. Kruskal Wallis test. \* $p < 0.05$ , \*\* $p < 0.01$ . Exact P values are shown. **b.** Neutralizing antibody response in serum were measured at 42 days post prime immunization (dpp). Neutralization titers against SARS-CoV-2 variants (Ancestral, Gamma, Alpha, Delta, Omicron BA.1 and BA.5) was determined by live virus assay. Neutralization titer was defined as the serum dilution that reduces 50% of the cytopathic effect (NT50). Points represent data of individual mice. Error Bars are GMT  $\pm$  SD values. Kruskal Wallis test. \* $p < 0.05$ , \*\* $p < 0.01$ . Exact P values are shown. Representative of two independent experiments. Source data are provided as a Source Data file.

## Supplementary Figure 2.

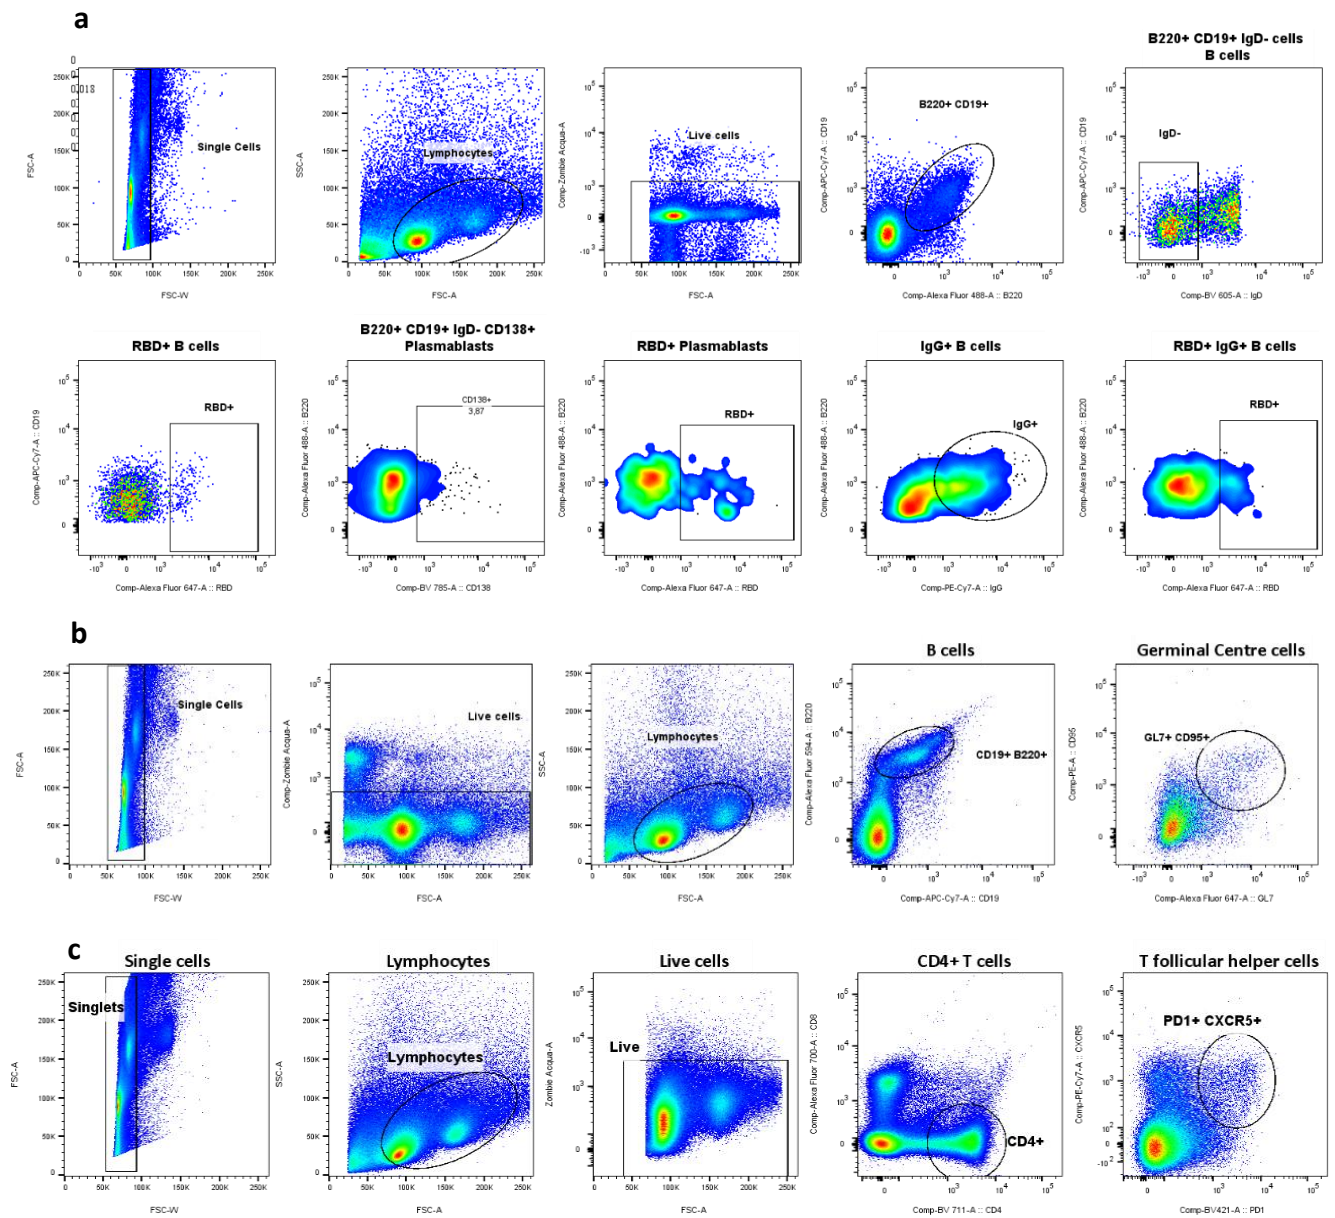

**Supplementary Figure 2.** Gating strategy of flow cytometry results presented in Figure 2. **a.** Gating strategy for the analysis of B cells and plasmablasts in spleen presented in Figure 2e. Dot plots with gates are shown in sequential order. **b.** Gating strategy for the analysis of Germinal Centre cells in spleen presented in Figure 2f. Dot plots with gates are shown in sequential order. **c.** Gating strategy for analysis of T follicular helper cells in spleen presented in Figure 2g. Dot plots with gates are shown in sequential order.

### Supplementary Figure 3.

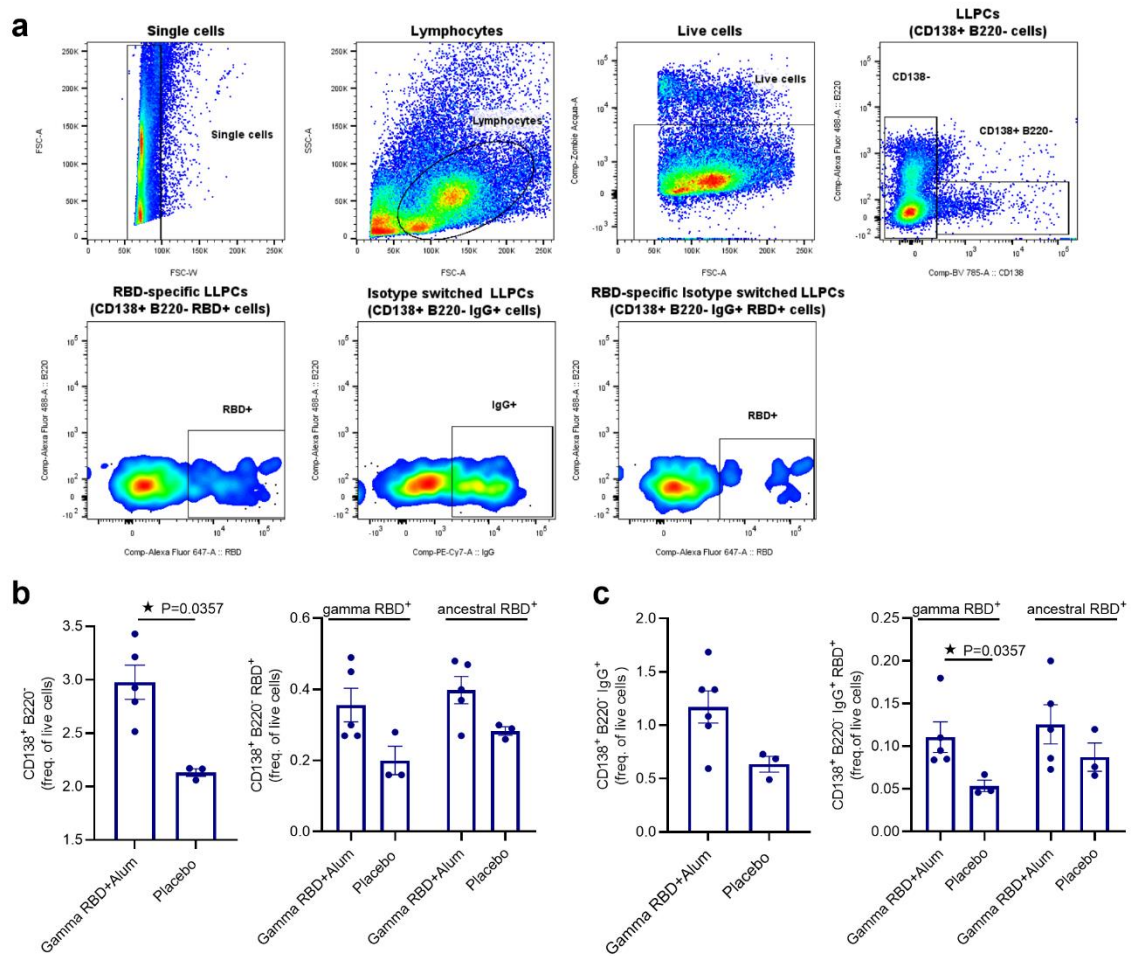

**Supplementary Figure 3. Long-lived plasma cells are present in bone marrow after mice immunization with the Gamma RBD vaccine.** BALB/c mice were immunized i.m with Gamma RBD+Alum (n=5 mice) or placebo (n= 3 mice) on days 0 and 14. **a.** Gating strategy for evaluation of LLCs and isotype-switched LLCs specific for RBD. **b.** LLCs were evaluated in the bone marrow at day 42 after mice immunization by flow cytometry. Cells suspensions were obtained, and live cells were stained with Zombie Aqua dye, then specific mAbs against B220, CD138 and IgG were used. Specificity was evaluated labelling cells with a fluorescent RBD antigen. Total (CD138<sup>+</sup> B220<sup>-</sup>) or specific (CD138<sup>+</sup> B220<sup>-</sup> RBD<sup>+</sup>) LLCs and total (CD138<sup>+</sup> B220<sup>-</sup> IgG<sup>+</sup>) or specific (CD138<sup>+</sup> B220<sup>-</sup> IgG<sup>+</sup> RBD<sup>+</sup>) isotype-switched LLCs frequencies are shown. Points are frequencies of the live cell population for each mouse. Error bars are means  $\pm$  SEM values. Two-sided Mann Whitney test. \*p<0.05 Exact P value is shown. Source data are provided as a Source Data file.

## Supplementary Figure 4.

### a. Gating strategy used for the evaluation of cytokine producing T cells:

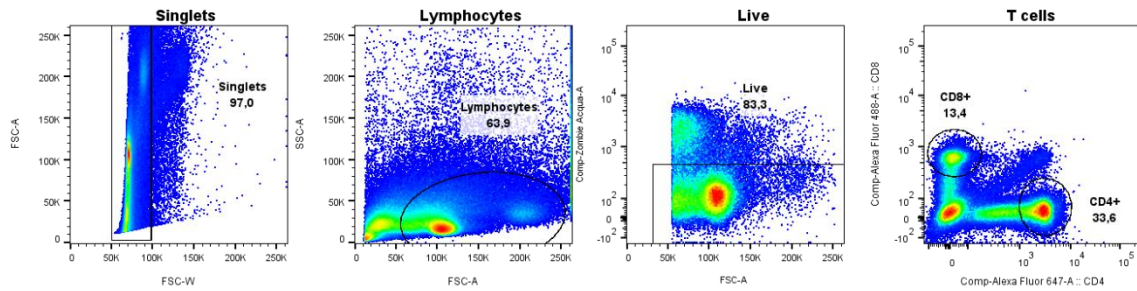

### b. Representative dot plots of the FMO control.

**FMO control (only include Zombie Acqua dye and anti-CD4 and CD8 antibodies.)**

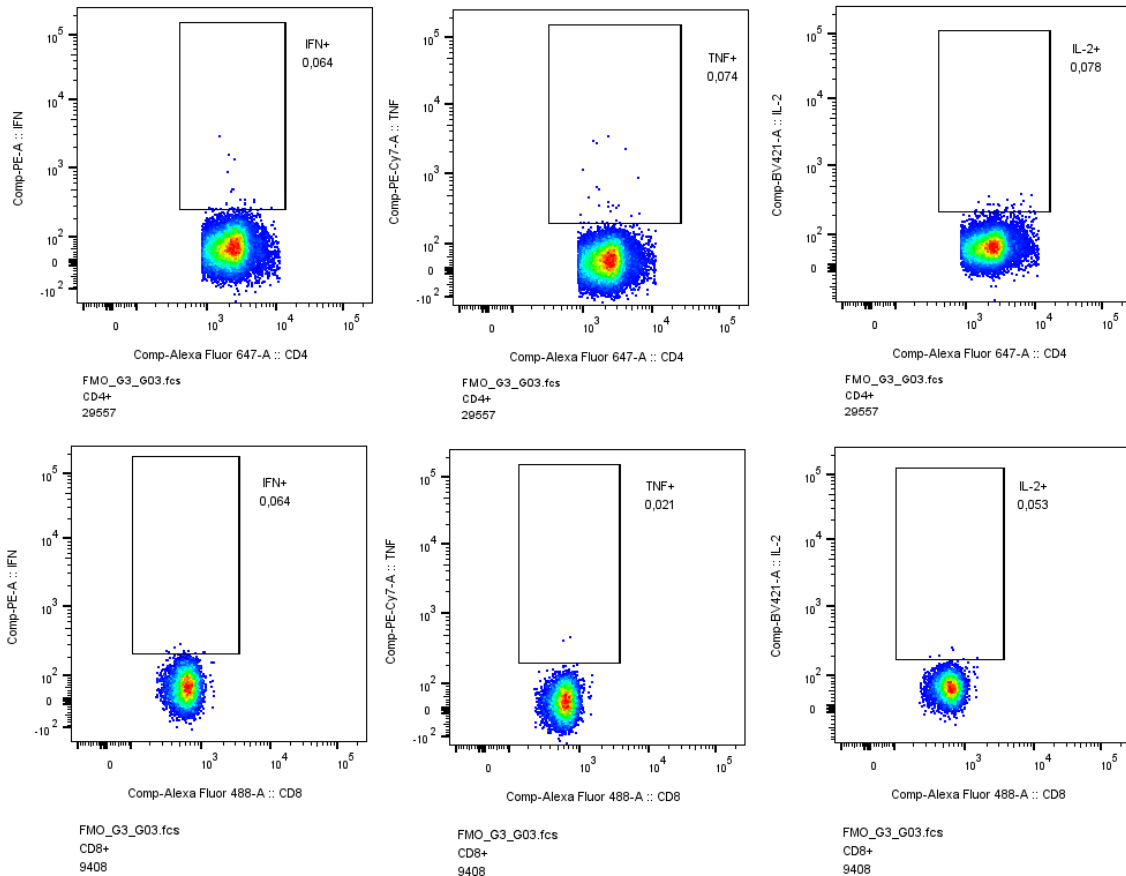

c. Representative dot plots of the flow cytometry data shown in Figure 4a.

Gamma RBD formulation- CD4+ T cells

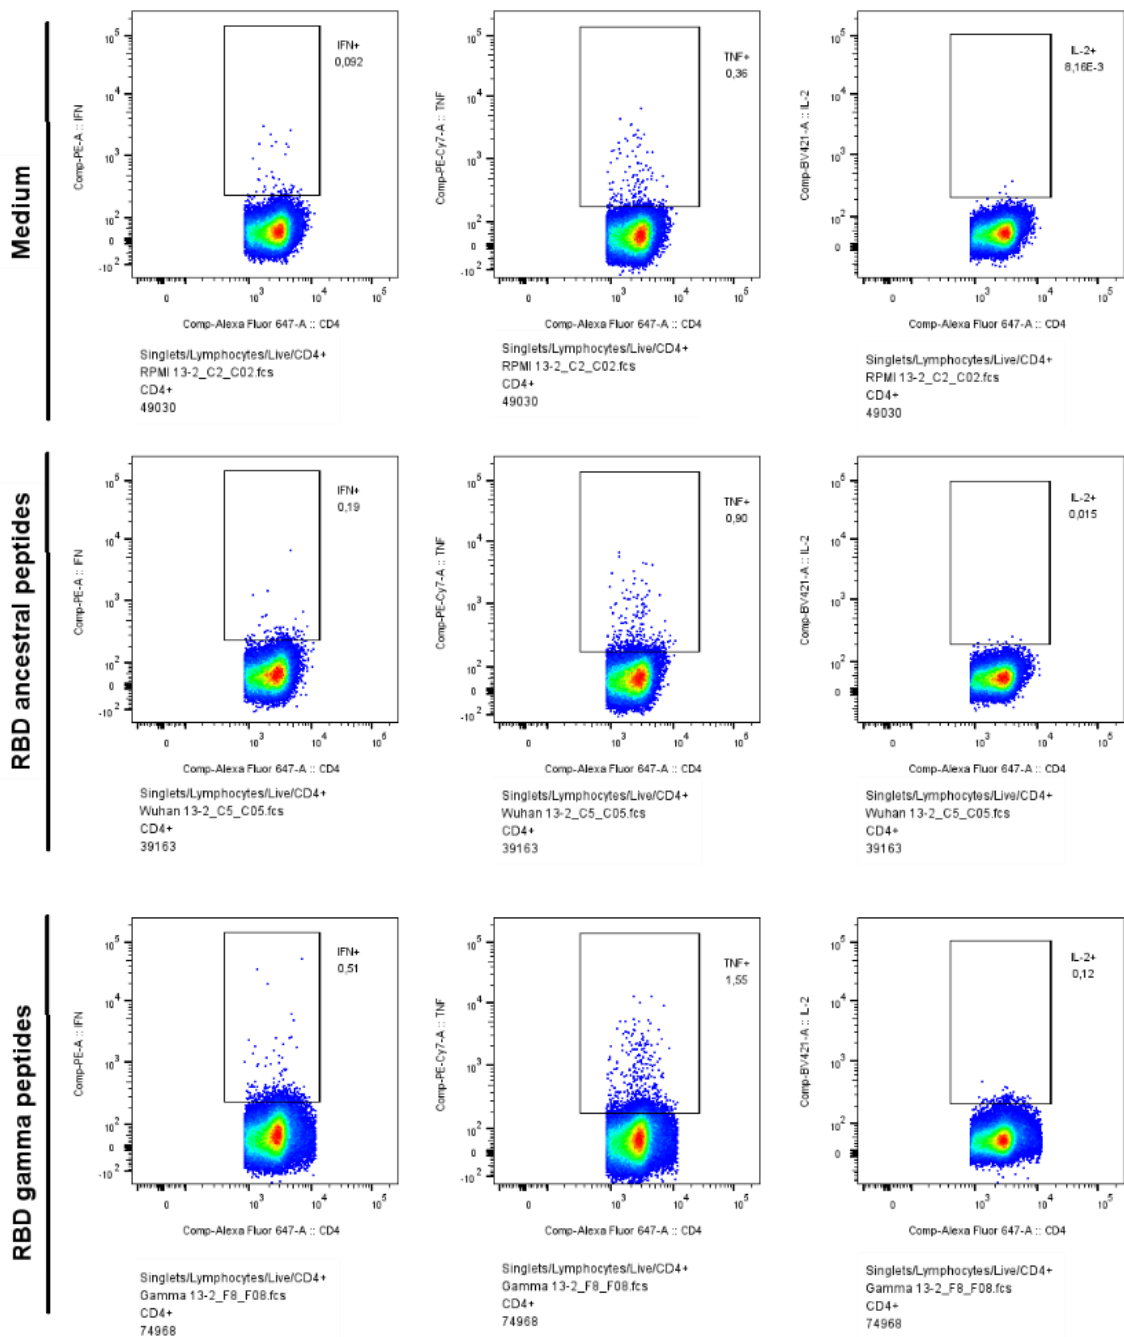

## Gamma RBD formulation- CD8+ T cells

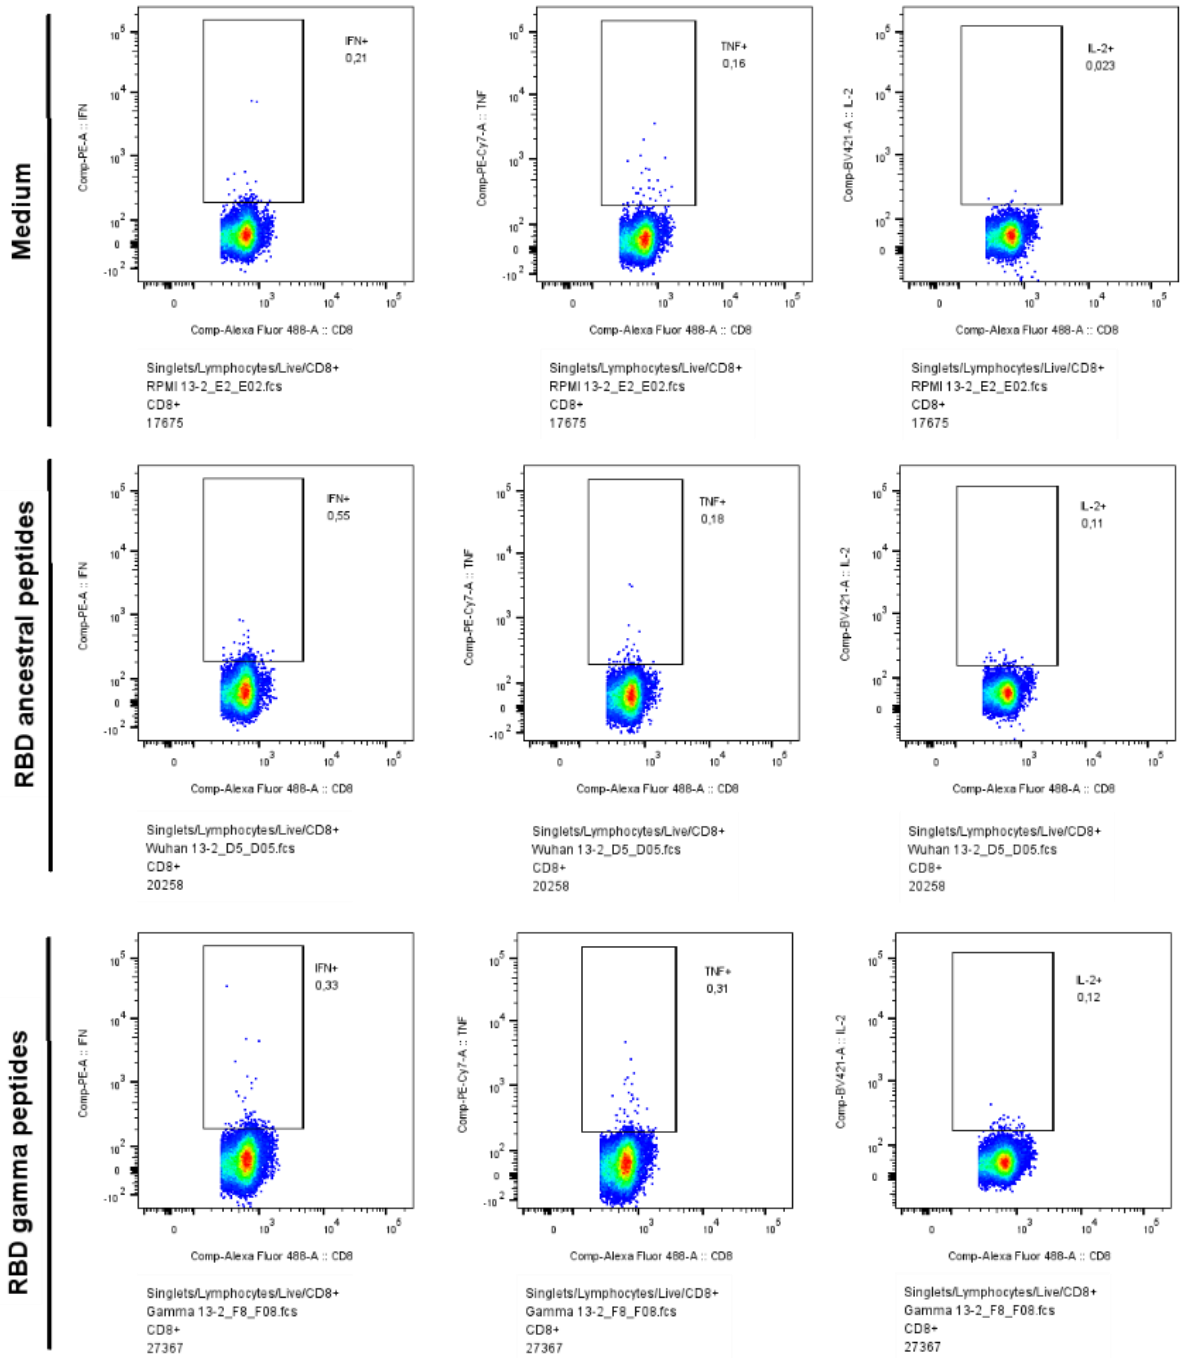

Ancestral RBD formulation-CD4+ T cells

Medium

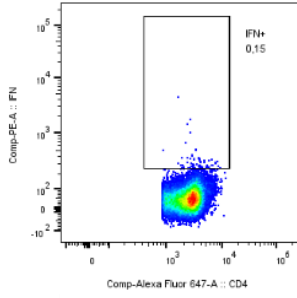

Singlets/Lymphocytes/Live/CD4+  
RPMI 13-1\_E1\_E01.fcs  
CD4+  
35667

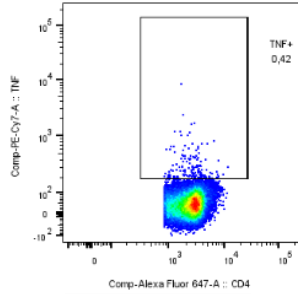

Singlets/Lymphocytes/Live/CD4+  
RPMI 13-1\_E1\_E01.fcs  
CD4+  
35667

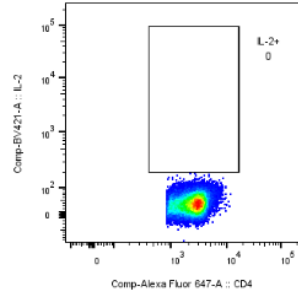

Singlets/Lymphocytes/Live/CD4+  
RPMI 13-1\_E1\_E01.fcs  
CD4+  
35667

RBD ancestral peptides

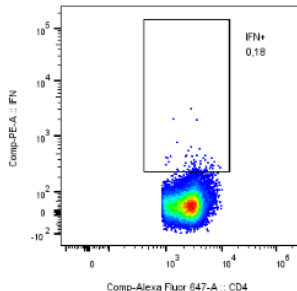

Singlets/Lymphocytes/Live/CD4+  
Wuhan 13-1\_C4\_C04.fcs  
CD4+  
35018

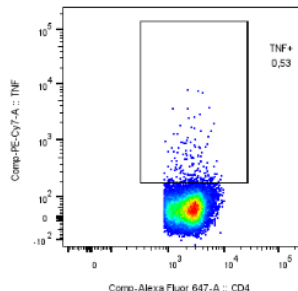

Singlets/Lymphocytes/Live/CD4+  
Wuhan 13-1\_C4\_C04.fcs  
CD4+  
35018

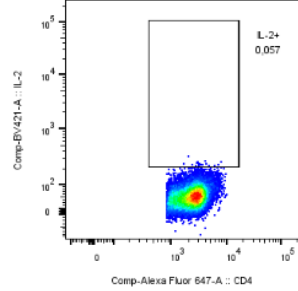

Singlets/Lymphocytes/Live/CD4+  
Wuhan 13-1\_C4\_C04.fcs  
CD4+  
35018

RBD gamma peptides

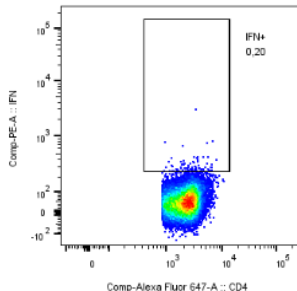

Singlets/Lymphocytes/Live/CD4+  
Gamma 13-1\_B7\_B07.fcs  
CD4+  
33076

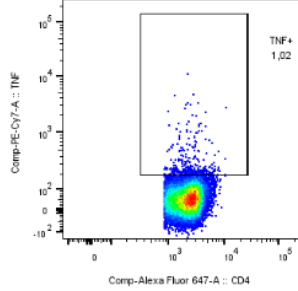

Singlets/Lymphocytes/Live/CD4+  
Gamma 13-1\_B7\_B07.fcs  
CD4+  
33076

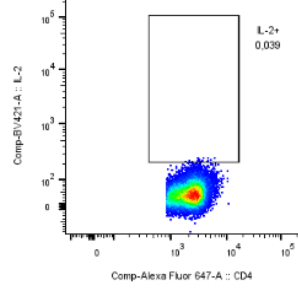

Singlets/Lymphocytes/Live/CD4+  
Gamma 13-1\_B7\_B07.fcs  
CD4+  
33076

## Ancestral RBD formulation- CD8<sup>+</sup> T cells

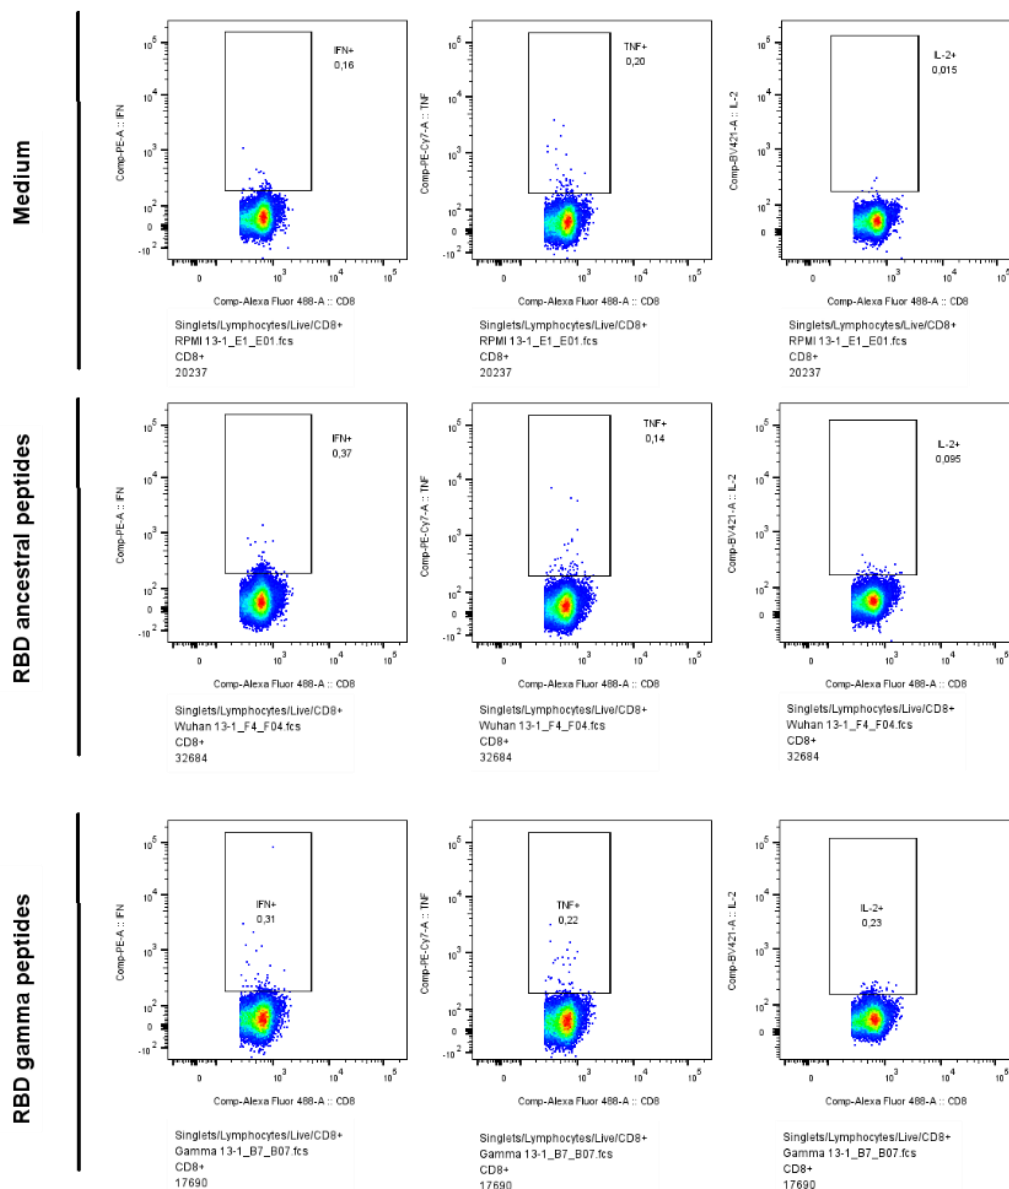

**Supplementary Figure 4.** Gating strategy of intracellular flow cytometry results presented in Figure 4a. **a.** Gating strategy used for the evaluation of cytokine producing CD4<sup>+</sup> and CD8<sup>+</sup> T cells. Dot plots with gates are shown in sequential order. **b.** Dot plots of the fluorescence minus one (FMO) control used to set negative populations of cytokine producing CD4<sup>+</sup> and CD8<sup>+</sup> T cells. **c.** Representative dot plots of the intracellular flow cytometry data shown in Figure 4a. Representative dot plots for each vaccinated group and each stimulus condition (medium, RBD ancestral peptides and RBD gamma peptides) is shown for each cytokine (IFN- $\gamma$ , TNF- $\alpha$  and IL-2).



## Supplementary Figure 5

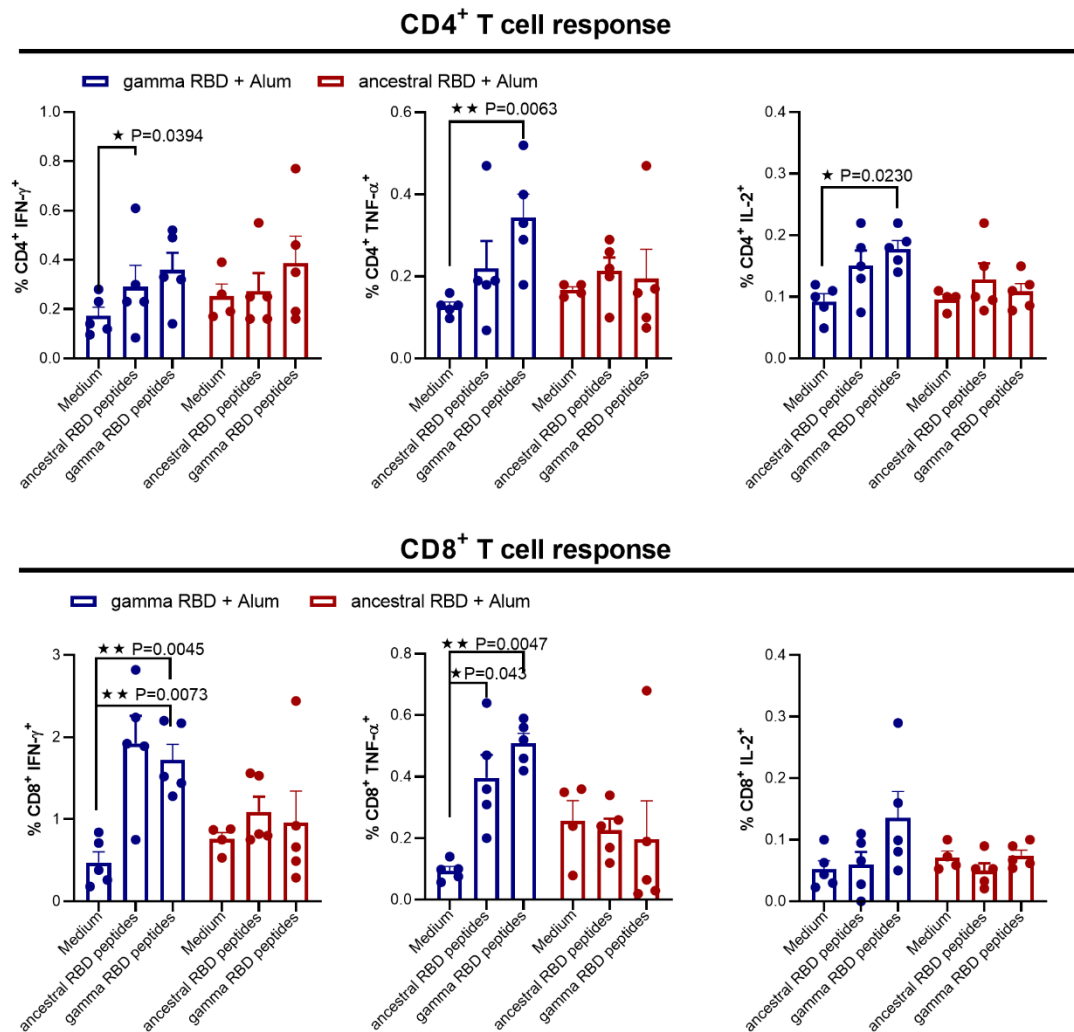

**Supplementary Figure 5. T cell immune responses elicited in C57BL/6 mice after vaccination with the Gamma and Ancestral RBD adjuvanted formulations.** C57BL/6 mice were i.m. inoculated on days 0 and 14 with Gamma RBD + Alum (blue circles, n=5 mice) or Ancestral RBD + Alum (red circles, n=5 mice). Cellular responses were evaluated in spleen 28 days after last immunization. **Intracellular flow cytometry analysis of cytokine secreting T cells.** Splenocytes were stimulated with complete media or a peptide pool derived from RBD (gamma or ancestral) and then brefeldin A was added. Afterward, cells were harvested and stained with specific Abs including anti-CD8, and anti-CD4, fixed, permeabilized, and stained intracellularly with anti-IFN- $\gamma$ , TNF- $\alpha$  and anti-IL-2. Results are presented as percentage of cytokine-producing CD4<sup>+</sup> (upper panel) or CD8<sup>+</sup> (lower panel) T cells. Bars are means  $\pm$  SEM. \*p < 0.05 vs. medium. \*\*p < 0.01 vs. medium. Exact p values are shown. Kruskal Wallis test. Source data are provided as a Source Data file.

**Supplementary Figure 6.**

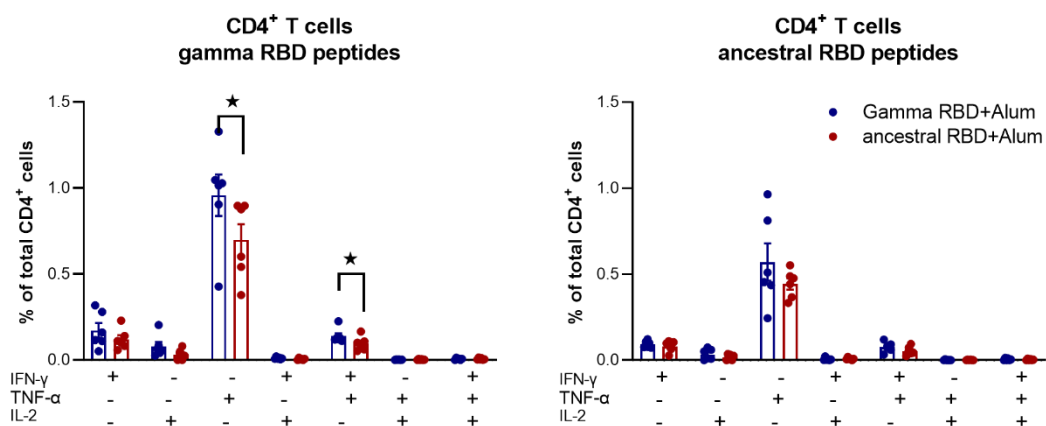

**Supplementary Figure 6. Assessment of polyfunctional T cells induced by vaccine formulations.** BALB/c mice were i.m. inoculated on days 0 and 14 with Gamma RBD + Alum (blue circles, n=5 mice) + Ancestral RBD + Alum (red circles, n=5 mice). Frequency of CD4<sup>+</sup> T cell populations from splenocytes that produce one, two or three cytokines after gamma (left panel) or ancestral (right panel) RBD peptides stimulation were plotted for each group of mice. Bars are means  $\pm$  SEM. \*P=0.0411. Kruskal Wallis test. Representative of two independent experiments. Source data are provided as a Source Data file.

Supplementary Figure 7.

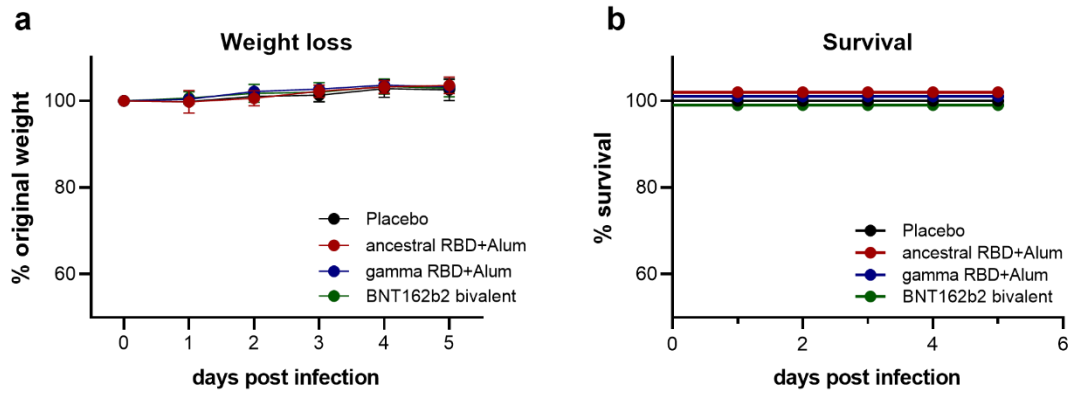

**Supplementary Figure 7. K18-hACE2 transgenic mice weight loss and survival after intranasal BA.5 SARS-CoV-2 infection.** Mice were i.m. inoculated on days 0 and 14 with: i) placebo (n=12 mice, black circles), ii) Gamma RBD + Alum (n=12 mice, blue circles), iii) Ancestral RBD + Alum (n=12 mice, red circles) or iv) bivalent BNT162b2 (n=12, green circles). Two weeks following immunization, mice were intranasally infected with  $1 \times 10^4$  PFU of Omicron BA.5. **a.** Weight changes in mice were monitored daily until day 5 after infection. Points are means  $\pm$  SEM of percentage of original weight. **b.** Survival were monitored daily until day 5. Each point represents the percentage of mice alive at that time. Source data are provided as a Source Data file.

Supplementary Figure 8.

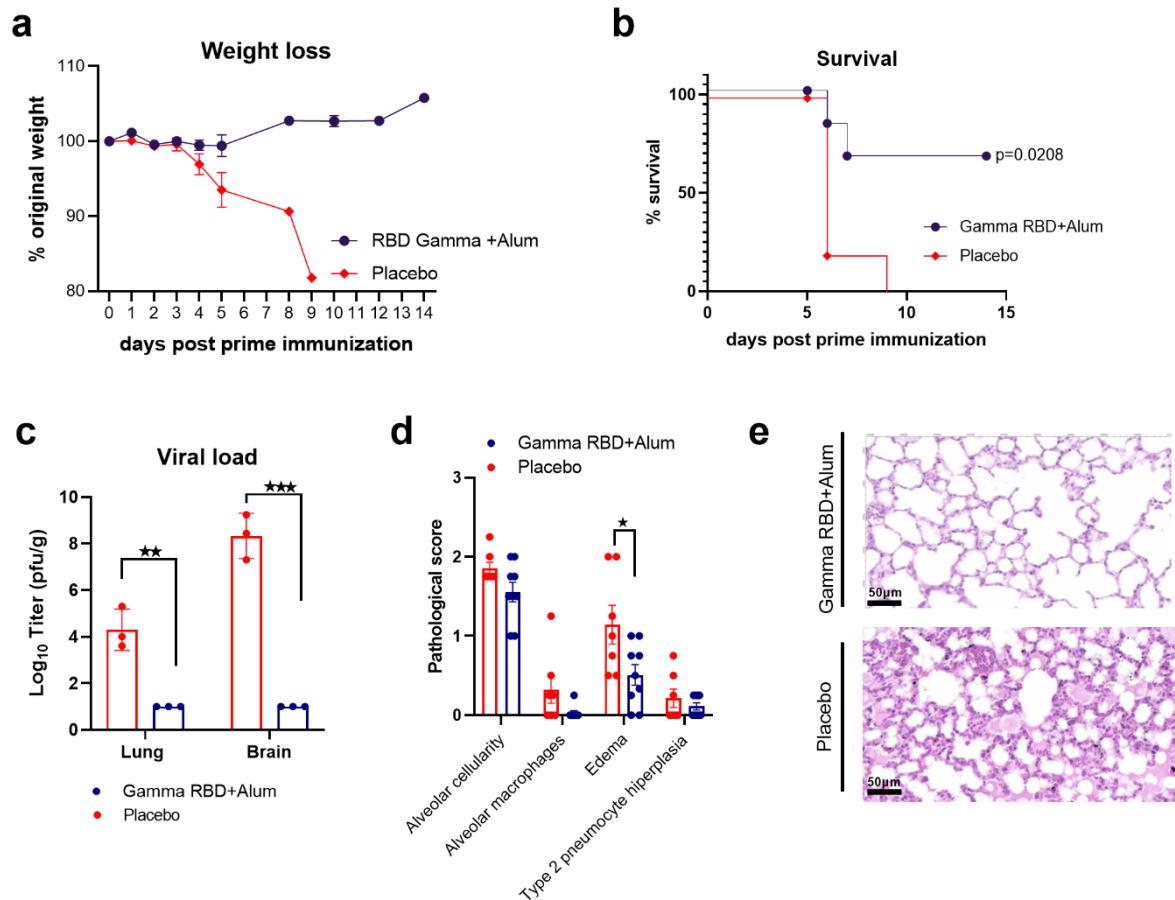

**Supplementary Figure 8. Vaccination with Gamma RBD + Alum protects K18-hACE2 transgenic mice against intranasal SARS-CoV-2 infection.** Mice received PBS (Control, n=8 mice) or Gamma RBD + Alum (n=9 mice) administered via i.m. route on days 0 and 14. Four weeks following immunization, K18-hACE2 mice were intranasally infected with  $2 \times 10^5$  PFU of SARS-CoV-2. **a.** Weight changes in mice were monitored daily until day 14 after infection. Points are means  $\pm$  SEM of percentage of original weight. **b.** Survival were monitored daily until day 14. Each point represents the percentage of mice alive at that time. Survival curves were analyzed with Log-rank (Mantel-Cox) test.  $P=0.0208$  vs placebo. **c.** Five days after infection lungs and brains (n=3) were obtained from groups of mice and SARS-CoV-2 virus was titrated. Bars represent the mean  $\pm$  SEM.  $**P < 0.01$  and  $***P < 0.001$ . Unpaired T test. **d.** Histopathologic studies were performed on lung samples from the indicated groups, and pathological scores were calculated for each parameter (alveolar cellularity, alveolar macrophages, edema and type 2 pneumocyte hyperplasia). Statistical analysis was conducted using Two-sided Mann-Whitney test.  $*P < 0.05$ . **e.** Hematoxylin and eosin staining of lung sections from K18-hACE2 infected mice at 5 dpi. Scale bars=50  $\mu$ m. Source data are provided as a Source Data file.

**Supplementary Table 1.** Antigenic distances calculated from vaccinated mouse sera obtained 28 days after the second dose. 1 unit of antigenic distance is equivalent to a two-fold dilution in neutralization titers. The lowest distance among the groups is colored in grey.

| Antigenic distances       |                   |                       |
|---------------------------|-------------------|-----------------------|
| SARS-CoV-2 variants       | Gamma RBD vaccine | Ancestral RBD vaccine |
| Ancestral-Gamma           | 0.60              | 1.87                  |
| Ancestral-Alpha           | 3.56              | 3.69                  |
| Ancestral-Delta           | 2.35              | 4.68                  |
| Ancestral-Omicron BA.1    | 2.62              | 4,50                  |
| Ancestral-Omicron BA.5    | 3.45              | 6,28                  |
| Gamma-Alpha               | 2.96              | 5.19                  |
| Gamma-Delta               | 1.94              | 4.49                  |
| Gamma-Omicron BA.1        | 2.33              | 3.79                  |
| Gamma-Omicron BA.5        | 2.86              | 8.14                  |
| Alpha-Delta               | 2.05              | 8.16                  |
| Alpha-Omicron BA.1        | 3.42              | 8.16                  |
| Alpha-Omicron BA.5        | 0.86              | 7.10                  |
| Delta-Omicron BA.1        | 3.76              | 1.32                  |
| Delta-Omicron BA.5        | 1.42              | 6.12                  |
| Omicron BA.1-Omicron BA.5 | 3.89              | 7.22                  |

**Supplementary Table 2.** Best linear (continuous) B-cell epitopes of the RBD of SARS-CoV-2 spike protein (Ancestral and Gamma variant) predicted by IEDB analysis of resources. BepiPred 2.0 was used to predict the linear B-cell epitopes of the RBD domain with a threshold of 0.5. Sequence of linear B cell epitopes, starting and end position, score and antigenicity predicted by Vaxijen 2.0 is shown. Residue substitution N501Y in the Gamma VOC sequence is shown in red. NA: no antigenic. A: antigenic. RBD protein sequence correspond to residues 319 to 537 of SARS-CoV-2 spike protein.

| No.                            | Start position | End position | Peptide                | Length | Score         | Antigenicity |
|--------------------------------|----------------|--------------|------------------------|--------|---------------|--------------|
| <b>-Ancestral RBD sequence</b> |                |              |                        |        |               |              |
| 3                              | 344            | 349          | ATRFAS                 | 6      | 0.1511        | NA           |
| 4                              | 351            | 363          | YAWNRKRISNCVA          | 13     | 0.3936        | NA           |
| 5                              | 372            | 378          | ASFSTFK                | 7      | 0.0865        | NA           |
| 9                              | 494            | 506          | SYGFQPTNGVGYQ          | 13     | 0.7632        | A            |
| 10                             | 524            | 534          | VCGPKKSTNLV            | 11     | 0.1358        | NA           |
| <b>-Gamma RBD sequence</b>     |                |              |                        |        |               |              |
| 3                              | 344            | 349          | ATRFAS                 | 6      | 0.1511        | NA           |
| 4                              | 351            | 363          | YAWNRKRISNCVA          | 13     | 0.3936        | NA           |
| 5                              | 372            | 378          | ASFSTFK                | 7      | 0.0865        | NA           |
| 9                              | 496            | 506          | SYGFQPT <b>Y</b> GVGYQ | 13     | <b>0.8457</b> | A            |

|    |     |     |             |    |        |    |
|----|-----|-----|-------------|----|--------|----|
| 10 | 524 | 534 | VCGPKKSTNLV | 11 | 0.1358 | NA |
|----|-----|-----|-------------|----|--------|----|

**Supplementary Table 3. In silico screening of MHC class II restricted T-cell based epitopes of the RBD protein from SARS-CoV-2.** Using netMHCpan 3.2 MHC-II (I-A/E) restricted epitopes of 9 residues in length in the two more common mouse haplotypes (d and b) were selected and scored by Vaxijen 2.0. WB= Weak binding. SB= Strong Binding. New epitopes generated are colored in grey.

| MHCII alleles |                  |                       |         |              |                   |         |              |            |                        |                       |         |         |                   |           |               |
|---------------|------------------|-----------------------|---------|--------------|-------------------|---------|--------------|------------|------------------------|-----------------------|---------|---------|-------------------|-----------|---------------|
| I-Ad          |                  |                       |         |              |                   |         | I-Ab         |            |                        |                       |         |         |                   |           |               |
| Position      | Peptide          | ancestral RBD antigen |         |              | gamma RBD antigen |         |              | Position   | Peptide                | ancestral RBD antigen |         |         | gamma RBD antigen |           |               |
|               |                  | Score                 | Binding | VaxiJen      | Score             | Binding | VaxiJen      |            |                        | Score                 | Binding | VaxiJen | Score             | Binding   | VaxiJen       |
| 20            | FGVEFNATRFASVYA  | 6.00                  | WB      | 0.0415 (NA)  | 6.00              | WB      | 0.0415 (NA)  | 18         | CPFGEVFNATRFASV        | 5.00                  | WB      | 0.2975  | 3.00              | WB        | 0.2975        |
| 21            | GEVFNATRFASVYAW  | 4.00                  | WB      | -0.1202 (NA) | 4.00              | WB      | -0.1202 (NA) | 19         | PFGEVFNATRFASVY        | 4.00                  | WB      | 0.0331  | 1.70              | SB        | 0.0331        |
| 22            | EVFNATRFASVYAWN  | 4.00                  | WB      | 0.0832 (NA)  | 4.00              | WB      | 0.0832 (NA)  | 20         | FGVEFNATRFASVYA        | 3.50                  | WB      | 0.0415  | 1.20              | SB        | 0.0415        |
| 23            | VFNATRFASVYAWNR  | 3.00                  | WB      | 0.0745 (NA)  | 3.00              | WB      | 0.0745 (NA)  | 21         | GEVFNATRFASVYAW        | 3.50                  | WB      | -0.1202 | 1.20              | SB        | -0.1202       |
| 24            | FNATRFASVYAWNRK  | 3.50                  | WB      | 0.4491 (A)   | 3.50              | WB      | 0.4491 (A)   | 22         | EVFNATRFASVYAWN        | 5.00                  | WB      | 0.0832  | 1.30              | SB        | 0.0832        |
| 25            | NATRFASVYAWNRKR  | 5.50                  | WB      | 0.4062 (A)   | 5.50              | WB      | 0.4062 (A)   | 23         | VFNATRFASVYAWNR        |                       |         |         | 1.60              | SB        | 0.0745        |
| 26            | ATRFASVYAWNRKRI  | 7.00                  | WB      | 0.3489 (NA)  | 7.00              | WB      | 0.3489 (NA)  | 24         | FNATRFASVYAWNRK        |                       |         |         | 3.00              | WB        | 0.4491        |
| 46            | DYSLVYNSASFSTFK  | 9.50                  | WB      | 0.2080 (NA)  | 9.50              | WB      | 0.2080 (NA)  | 25         | NATRFASVYAWNRKR        |                       |         |         | 6.00              | WB        | 0.4062        |
| 47            | VYSLVYNSASFSTFKC | 9.50                  | WB      | 0.1176 (NA)  | 9.50              | WB      | 0.1176 (NA)  | 26         | ATRFASVYAWNRKRI        |                       |         |         | 7.00              | WB        | 0.4062        |
| 182           | VVLSPELLHAPATVC  | 9.00                  | WB      | 0.8083 (A)   | 9.00              | WB      | 0.8083 (A)   | 27         | TRFASVYAWNRKRIS        | 7.00                  | WB      | 0.4963  | 10.00             | WB        | 0.4963        |
| 183           | VVLSPELLHAPATVCG | 8.00                  | WB      | 0.8618 (A)   | 8.00              | WB      | 0.8618 (A)   | 28         | RFASVYAWNRKRISN        | 8.50                  | WB      | 0.4243  |                   |           |               |
| 184           | VLSPELLHAPATVCGG | 8.00                  | WB      | 0.4784 (A)   | 8.00              | WB      | 0.4784(A)    | 29         | FASVYAWNRKRISNC        | 9.50                  | WB      | 0.3676  |                   |           |               |
| 185           | LSPELLHAPATVCGGP | 9.00                  | WB      | 0.5062 (A)   | 9.00              | WB      | 0.5062 (A)   | 30         | ASVYAWNRKRISNCV        | 9.50                  | WB      | 0.3086  |                   |           |               |
|               |                  |                       |         |              |                   |         |              | 44         | VADYSLVYNSASFST        | 8.00                  | WB      | 0.2729  | 5.50              | WB        | 0.2729        |
|               |                  |                       |         |              |                   |         |              | 45         | ADYSLVYNSASFSTF        | 5.00                  | WB      | 0.2252  | 3.00              | WB        | 0.2252        |
|               |                  |                       |         |              |                   |         |              | 46         | DYSLVYNSASFSTFK        | 4.50                  | WB      | 0.2080  | 2.50              | WB        | 0.2080        |
|               |                  |                       |         |              |                   |         |              | 47         | YSLVYNSASFSTFKC        | 5.00                  | WB      | 0.1176  | 3.00              | WB        | 0.1176        |
|               |                  |                       |         |              |                   |         |              | 48         | SVLYNSASFSTFKCY        | 6.50                  | WB      | 0.1871  | 4.50              | WB        | 0.1871        |
|               |                  |                       |         |              |                   |         |              | 49         | VLYNSASFSTFKCYG        | 9.00                  | WB      | 0.1776  | 7.50              | WB        | 0.1776        |
|               |                  |                       |         |              |                   |         |              | 55         | SFSTFKCYGVSPTKL        | 8.00                  | WB      | 0.9327  | 6.00              | WB        | 0.9327        |
|               |                  |                       |         |              |                   |         |              | 56         | FSTFKCYGVSPTKLN        | 4.00                  | WB      | 1.0042  | 5.00              | WB        | 1.0042        |
|               |                  |                       |         |              |                   |         |              | 57         | STFKCYGVSPTKLND        | 4.50                  | WB      | 1.2022  | 6.00              | WB        | 1.2022        |
|               |                  |                       |         |              |                   |         |              | 58         | TFKCYGVSPTKLNDL        | 5.50                  | WB      | 1.4626  | 6.00              | WB        | 1.4626        |
|               |                  |                       |         |              |                   |         |              | 59         | FKCYGVSPTKLNDLC        | 8.00                  | WB      | 1.7128  |                   |           |               |
|               |                  |                       |         |              |                   |         |              | 149        | DISTEIQAGSTPCNC        | 3.50                  | WB      | 0.1568  | 5.00              | WB        | 0.1568        |
|               |                  |                       |         |              |                   |         |              | 150        | ISTEIQAGSTPCNG         | 3.00                  | WB      | -0.1516 | 4.00              | WB        | -0.1516       |
|               |                  |                       |         |              |                   |         |              | 151        | STEIQAGSTPCNGV         | 3.00                  | WB      | -0.0513 | 2.50              | WB        | -0.0513       |
|               |                  |                       |         |              |                   |         |              | 152        | TEIQAGSTPCNGVE         | 3.00                  | WB      | -0.0028 | 3.00              | WB        | -0.0544       |
|               |                  |                       |         |              |                   |         |              | 153        | EIQAGSTPCNGVEG         | 4.00                  | WB      | -0.0305 | 4.00              | WB        | 0.0218        |
|               |                  |                       |         |              |                   |         |              | 154        | IYQAGSTPCNGVEGF        | 5.50                  | WB      | -0.1715 | 6.50              | WB        | -0.1477       |
|               |                  |                       |         |              |                   |         |              | 171        | YPLQSYGFQPTNGV         | 9.50                  | WB      | 0.6881  |                   |           |               |
|               |                  |                       |         |              |                   |         |              | 172        | FPLOSYGQPTNGVG         | 9.00                  | WB      | 0.5697  |                   |           |               |
|               |                  |                       |         |              |                   |         |              | 173        | PLQSYGFQPTNGVGY        | 7.50                  | WB      | 0.3415  | 6.50              | WB        | 0.4135        |
|               |                  |                       |         |              |                   |         |              | 174        | LQSYGFQPTNGVGYQ        | 8.00                  | WB      | 0.5299  | 5.50              | WB        | 0.6057        |
|               |                  |                       |         |              |                   |         |              | <b>175</b> | <b>QSYGFQPTYGVGYQP</b> |                       |         |         | <b>6.50</b>       | <b>WB</b> | <b>0.7291</b> |
|               |                  |                       |         |              |                   |         |              | <b>176</b> | <b>SYGFQPTYGVGYQPY</b> |                       |         |         | <b>8.00</b>       | <b>WB</b> | <b>0.8603</b> |
|               |                  |                       |         |              |                   |         |              | <b>181</b> | <b>PTVGVGYQPYRVVVL</b> |                       |         |         | <b>9.50</b>       | <b>WB</b> | <b>0.6453</b> |
|               |                  |                       |         |              |                   |         |              | 182        | TNGVGYQPYRVVVL         | 9.50                  | WB      | 0.5763  | 7.00              | WB        | 0.8573        |
|               |                  |                       |         |              |                   |         |              | 183        | YGVGYQPYRVVLSF         |                       |         |         | 6.00              | WB        | 1.0888        |
|               |                  |                       |         |              |                   |         |              | 184        | GVGYQPYRVVLSFE         |                       |         |         | 6.50              | WB        | 1.3049        |
|               |                  |                       |         |              |                   |         |              | 185        | VGYQPYRVVLSFEL         |                       |         |         | 8.50              | WB        | 1.3858        |
|               |                  |                       |         |              |                   |         |              | 191        | VVLSPELLHAPAT          | 9.50                  | WB      | 0.7485  | 6.00              | WB        | 0.7485        |
|               |                  |                       |         |              |                   |         |              | 192        | VVLSPELLHAPATV         | 4.50                  | WB      | 0.8083  | 3.00              | WB        | 0.8083        |
|               |                  |                       |         |              |                   |         |              | 193        | VVLSPELLHAPATVC        | 3.00                  | WB      | 0.8618  | 2.50              | WB        | 0.8618        |
|               |                  |                       |         |              |                   |         |              | 194        | VLSPELLHAPATVCG        | 1.80                  | SB      | 0.4784  | 1.70              | SB        | 0.4784        |
|               |                  |                       |         |              |                   |         |              | 195        | LSPELLHAPATVCGP        | 1.70                  | SB      | 0.5062  | 1.60              | SB        | 0.5062        |
|               |                  |                       |         |              |                   |         |              | 196        | SPELLHAPATVCGPK        | 2.50                  | WB      | 0.2085  | 1.90              | SB        | 0.2085        |
|               |                  |                       |         |              |                   |         |              | 197        | FELLHAPATVCGPK         | 3.00                  | WB      | 0.0687  | 3.50              | WB        | 0.1188        |
|               |                  |                       |         |              |                   |         |              | 198        | ELLHAPATVCGPKKS        | 8.50                  | WB      | -0.1259 |                   |           |               |

**Supplementary Table 4. In silico screening of MHC class I restricted T-cell based epitopes of the RBD protein from SARS-CoV-2.** Using netMHCpan 4.1 MHC-I (H-2-D/K) restricted epitopes of 9 residues in length in the two more common mouse haplotypes (d and b) were selected and scored by Vaxijen 2.0. WB= Weak binding. SB= Strong Binding. New epitopes generated are colored in grey.

| MHCi alleles |                     |                       |         |              |                   |         |              |          |           |                       |         |         |                   |         |         |
|--------------|---------------------|-----------------------|---------|--------------|-------------------|---------|--------------|----------|-----------|-----------------------|---------|---------|-------------------|---------|---------|
| H-2-Dd       |                     |                       |         |              |                   |         | H-2-Db       |          |           |                       |         |         |                   |         |         |
| Position     | Peptide             | ancestral RBD antigen |         |              | gamma RBD antigen |         |              | Position | Peptide   | ancestral RBD antigen |         |         | gamma RBD antigen |         |         |
|              |                     | Score                 | Binding | VaxiJen      | Score             | Binding | VaxiJen      |          |           | Score                 | Binding | VaxiJen | Score             | Binding | VaxiJen |
| 6            | ESIVRFPNI           | 0.695                 | WB      | -0.1429 (NA) | 0.695             | SB      | -0.1429 (NA) | 9        | VRFPNITNL | 0.368                 | SB      | 1.1141  | 0.368             | SB      | 1.1141  |
| 9            | VRFPNITNL           | 0.403                 | SB      | 1.1141 (A)   | 0.403             | WB      | 1.1141 (A)   | 48       | SVLYNSASF | 0.140                 | SB      | 0.1857  | 0.140             | SB      | 0.1857  |
| 24           | FNATRFASV           | 0.975                 | WB      | 0.5609 (A)   | 0.975             | WB      | 0.5609 (A)   | 64       | VSPTKLNDL | 0.493                 | SB      | 1.4610  | 0.493             | SB      | 1.4610  |
| 48           | SVLYNSASF           | 1.63                  | WB      | 0.1857 (NA)  | 1.631             | WB      | 0.1857 (NA)  | 92       | IAPGQTGI  |                       |         | 0.613   | WB                | 1.4132  |         |
| 51           | YNSASFSTF           | 0.378                 | SB      | 0.3005 (NA)  | 0.378             | SB      | 0.3005 (NA)  | 103      | YNYKLPDDF | 1.983                 | WB      | 0.4828  | 1.983             | WB      | 0.4828  |
| 64           | VSPTKLNDL           | 0.016                 | SB      | 1.4610 (A)   | 0.016             | SB      | 1.4610 (A)   | 115      | VIWNSNLL  | 1.078                 | WB      | 0.7216  | 1.078             | WB      | 0.7216  |
| 92           | IAPGQTGKI IAPGQTGTI | 0.197                 | SB      | 1.6527 (A)   | 0.098             | SB      | 1.4132 (A)   | 126      | KVGGNYYNL | 0.128                 | SB      | 0.5994  | 0.128             | SB      | 0.5994  |
| 99           | KIADYNYKL           | 1.25                  | WB      | 1.6639 (A)   |                   |         |              | 166      | KGFCYFPL  |                       |         | 1.296   | WB                | 0.5711  |         |
| 103          | YNYKLPDDF           | 1.45                  | WB      | 0.4828 (A)   | 1.453             | WB      | 0.4828 (A)   | 177      | YGFPPTGV  |                       |         | 1.927   | WB                | 1.0317  |         |
| 126          | KVGGNYYNL           | 1.77                  | WB      | 0.5994 (A)   | 1.772             | WB      | 0.5994 (A)   | 179      | FOPTNGVGY | 0.812                 | WB      | 0.3114  |                   |         |         |
| 129          | GNYYLYRL            | 0.895                 | WB      | 0.1170 (NA)  | 0.895             | WB      | 0.1170 (NA)  | 187      | YQPYRVVVL | 0.258                 | SB      | 0.5964  | 0.258             | SB      | 0.5964  |
| 166          | KGFCYFPL            |                       |         | 0.944        | 0.944             | WB      | 0.5711 (A)   | 191      | RVVLSFELL | 0.910                 | WB      | 1.1918  | 0.910             | WB      | 1.1918  |
| 175          | QSYGFQPTY           |                       |         | 1.124        | 1.124             | WB      | 1.1150 (A)   | 192      | VVLSFELL  | 0.949                 | WB      | 1.0909  | 0.949             | WB      | 1.0909  |
| 177          | YGFPPTNGV/YGFPPTYGV | 1.79                  | WB      | 1.0509 (A)   | 1.449             | WB      | 1.0317 (A)   | 207      | CGPKKSTNL | 1.001                 | WB      | 0.1363  | 1.001             | WB      | 0.1363  |
| 185          | VGYPYRVV            | 0.279                 | SB      | 1.4383 (A)   | 0.279             | SB      | 1.4383 (A)   |          |           |                       |         |         |                   |         |         |
| 187          | YQPYRVVVL           | 0.056                 | SB      | 0.5964 (A)   | 0.056             | SB      | 0.5964 (A)   |          |           |                       |         |         |                   |         |         |
| 192          | VVLSFELL            | 1.36                  | WB      | 1.2366 (A)   | 1.364             | WB      | 1.0909 (A)   |          |           |                       |         |         |                   |         |         |
| 207          | CGPKKSTNL           | 0.009                 | SB      | 0.1363 (NA)  | 0.009             | SB      | 0.1363 (NA)  |          |           |                       |         |         |                   |         |         |

  

| H-2-Kb   |                     |                       |         |         |                   |         |         |          |                     |                       |         |         |                   |         |         |
|----------|---------------------|-----------------------|---------|---------|-------------------|---------|---------|----------|---------------------|-----------------------|---------|---------|-------------------|---------|---------|
| Position | Peptide             | ancestral RBD antigen |         |         | gamma RBD antigen |         |         | Position | Peptide             | ancestral RBD antigen |         |         | gamma RBD antigen |         |         |
|          |                     | Score                 | Binding | VaxiJen | Score             | Binding | VaxiJen |          |                     | Score                 | Binding | VaxiJen | Score             | Binding | VaxiJen |
| 6        | ESIVRFPNI           | 0.614                 | <= WB   | -0.1429 | 0.614             | WB      | -0.1429 | 9        | VRFPNITNL           | 0.136                 | <= SB   | 1.1141  | 0.136             | SB      | 1.1141  |
| 9        | VRFPNITNL           | 0.136                 | <= SB   | 1.1141  | 0.136             | SB      | 1.1141  | 24       | FNATRFASV           | 0                     | <= SB   | 0.5609  | 0.287             | SB      | 0.5609  |
| 24       | FNATRFASV           | 0                     | <= SB   | 0.5609  | 0.287             | SB      | 0.5609  | 48       | SVLYNSASF           | 1                     | <= SB   | 0.1857  | 0.963             | WB      | 0.1857  |
| 48       | SVLYNSASF           | 1.351                 | <= SB   | 0.3005  | 1.351             | WB      | 0.3005  | 51       | YNSASFSTF           | 0.384                 | <= SB   | 1.4610  | 0.384             | SB      | 1.461   |
| 51       | YNSASFSTF           | 0.384                 | <= SB   | 1.4610  | 0.384             | SB      | 1.461   | 64       | VSPTKLNDL           | 1                     | <= WB   | 1.663   | 0.630             | WB      | 1.6035  |
| 64       | VSPTKLNDL           | 1.038                 | <= WB   | 0.7216  | 1.038             | WB      | 0.7216  | 99       | KIADYNYKL/TIADYNYKL | 0.036                 | <= SB   | 0.1170  | 0.036             | SB      | 0.1170  |
| 99       | KIADYNYKL/TIADYNYKL | 1                     | <= WB   | 1.663   | 0.630             | WB      | 1.6035  | 115      | VIWNSNLL            | 1.728                 | <= WB   | 0.5994  | 1.728             | WB      | 0.5994  |
| 115      | VIWNSNLL            | 1.038                 | <= WB   | 0.7216  | 1.038             | WB      | 0.7216  | 126      | KVGGNYYNL           | 0.036                 | <= SB   | 0.1170  | 0.036             | SB      | 0.1170  |
| 126      | KVGGNYYNL           | 1.728                 | <= WB   | 0.5994  | 1.728             | WB      | 0.5994  | 129      | GNYYLYRL            |                       |         | 1.046   | WB                | 0.5711  |         |
| 129      | GNYYLYRL            | 0.036                 | <= SB   | 0.1170  | 0.036             | SB      | 0.1170  | 166      | KGFCYFPL            |                       |         | 0.847   | WB                | 1.1150  |         |
| 166      | KGFCYFPL            |                       |         | 1.046   | 1.046             | WB      | 0.5711  | 175      | QSYGFQPTY           |                       |         | 1.852   | WB                | 1.0317  |         |
| 175      | QSYGFQPTY           |                       |         | 1.852   | 1.852             | WB      | 1.0317  | 177      | YGFPPTGV            | 0.132                 | <= SB   | 1.4383  | 0.132             | SB      | 1.4383  |
| 177      | YGFPPTGV            | 0.132                 | <= SB   | 1.4383  | 0.132             | SB      | 1.4383  | 185      | VGYPYRVV            | 1.085                 | <= WB   | 0.5964  | 1.085             | WB      | 0.5964  |
| 185      | VGYPYRVV            | 1.085                 | <= WB   | 0.5964  | 1.085             | WB      | 0.5964  | 187      | YQPYRVVVL           | 0.263                 | <= SB   | 1.0909  | 0.263             | SB      | 1.0909  |
| 187      | YQPYRVVVL           | 0.263                 | <= SB   | 1.0909  | 0.263             | SB      | 1.0909  | 192      | VVLSFELL            | 0.953                 | <= WB   | 0.1363  | 0.953             | WB      | 0.1363  |
| 192      | VVLSFELL            | 0.953                 | <= WB   | 0.1363  | 0.953             | WB      | 0.1363  | 207      | CGPKKSTNL           |                       |         |         |                   |         |         |
| 207      | CGPKKSTNL           |                       |         |         |                   |         |         |          |                     |                       |         |         |                   |         |         |

  

| H-2-Ld   |                     |                       |         |              |                   |         |              |
|----------|---------------------|-----------------------|---------|--------------|-------------------|---------|--------------|
| Position | Peptide             | ancestral RBD antigen |         |              | gamma RBD antigen |         |              |
|          |                     | Score                 | Binding | VaxiJen      | Score             | Binding | VaxiJen      |
| 3        | OPTESIVRF           | 0.099                 | SB      | -0.5551 (NA) | 0.099             | SB      | -0.5551 (NA) |
| 9        | VRFPNITNL           | 1.69                  | SB      | 1.1141 (A)   | 1.697             | SB      | 1.1141 (A)   |
| 48       | SVLYNSASF           | 1.57                  | WB      | 0.1857 (NA)  | 1.573             | WB      | 0.1857 (NA)  |
| 51       | YNSASFSTF           | 1.38                  | WB      | 0.3005 (NA)  | 1.382             | WB      | 0.3005 (NA)  |
| 103      | YNYKLPDDF           | 1.11                  | SB      | 0.4828 (A)   | 1.118             | SB      | 0.4828 (A)   |
| 160      | TPCNGVEGF/TPCNGVKGF | 0.64                  | WB      | 0.6322 (A)   | 1.130             | WB      | -0.3226 (NA) |
| 191      | RVVLSFELL           | 0.997                 | WB      | 1.1918 (A)   | 0.997             | WB      | 1.1918 (A)   |
| 208      | GPVKSTNLV           | 1.44                  | WB      | 0.6828 (A)   | 1.435             | WB      | 0.6828 (A)   |

## Supplementary Methods.

### Prediction of restricted B and T-cell epitopes in the antigen sequences

Linear B-cell epitopes of the SARS-CoV-2 S protein were predicted by with a threshold of 0.5, and only the epitopes with a length between 5-25 residues were considered for subsequent antigenicity analysis. Antigenicity was evaluated via the VaxiJen v2.0 server online tool (VaxiJen v2.0., The Jenner Institute, Oxford, UK). Peptides with a score  $\geq 0.4$  were considered antigenic. Discontinuous B-cell epitopes were predicted via the DiscoTope 1.1 server tool in IEDB with a default threshold of -7.7 (corresponding specificity  $> 0.75$  and

sensitivity < 0.47), based on the 3-dimensional (3D) structures of the SARS-CoV-2 RBD proteins obtained with Swiss model.

HTL- cell epitopes, were predicted based on the Net MHC pan 3.2 algorithm in IEDB. The 2 haplotypes chosen, H-2-IA<sup>d/b</sup> and H-2-IE<sup>d/b</sup>, are common in laboratory mice strains. The algorithm was asked to predict peptides between 8 and 11 amino acids in length, for each haplotype. CD8<sup>+</sup> T-cell epitopes were predicted based on the Net MHC pan 4.1 algorithm in IEDB, the peptide length selected was of 15 residues. As mentioned before, the haplotypes for the MHC class I molecules, were chosen according to the most prevalent in common laboratory mice strains (H-2-D<sup>d/b</sup>, H-2-K<sup>d/b</sup>). The prediction values are given in IC50 values (in nanoMolars) and as %Rank. The percentile rank for a peptide is generated by comparing its score against the scores of 200,000 random natural peptides of the same length of the query peptide. Strong and weak binding peptides are identified based on %Rank (Threshold strong binder: 2, Threshold weak binder: 10).
